# Supplementary material for: Multiplexed Imaging Mass Cytometry Analysis in Preclinical Models of Pancreatic Cancer
Source: MDPI journal article supplement (doi:10.3390/ijms25031389), 2024-01-23
Supplement: s1 [file s1]

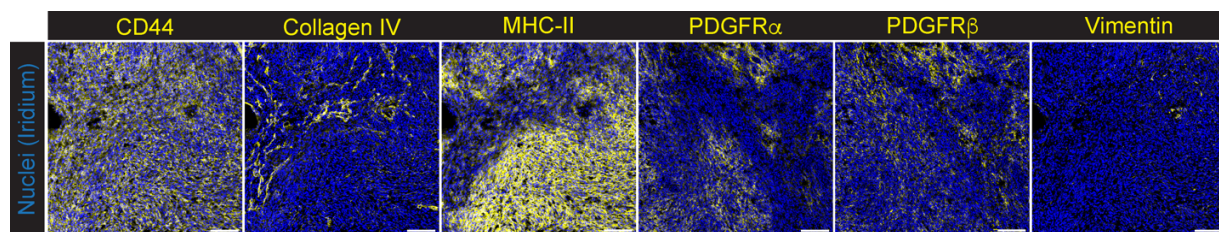

**Supplementary Figure S1: Expression of different markers at the tumor–stroma interface of the orthotopic PDAC model by IMC.** Nuclei (Ir, blue) and marker expression (yellow) are shown. Bar, 100 $\mu$ m

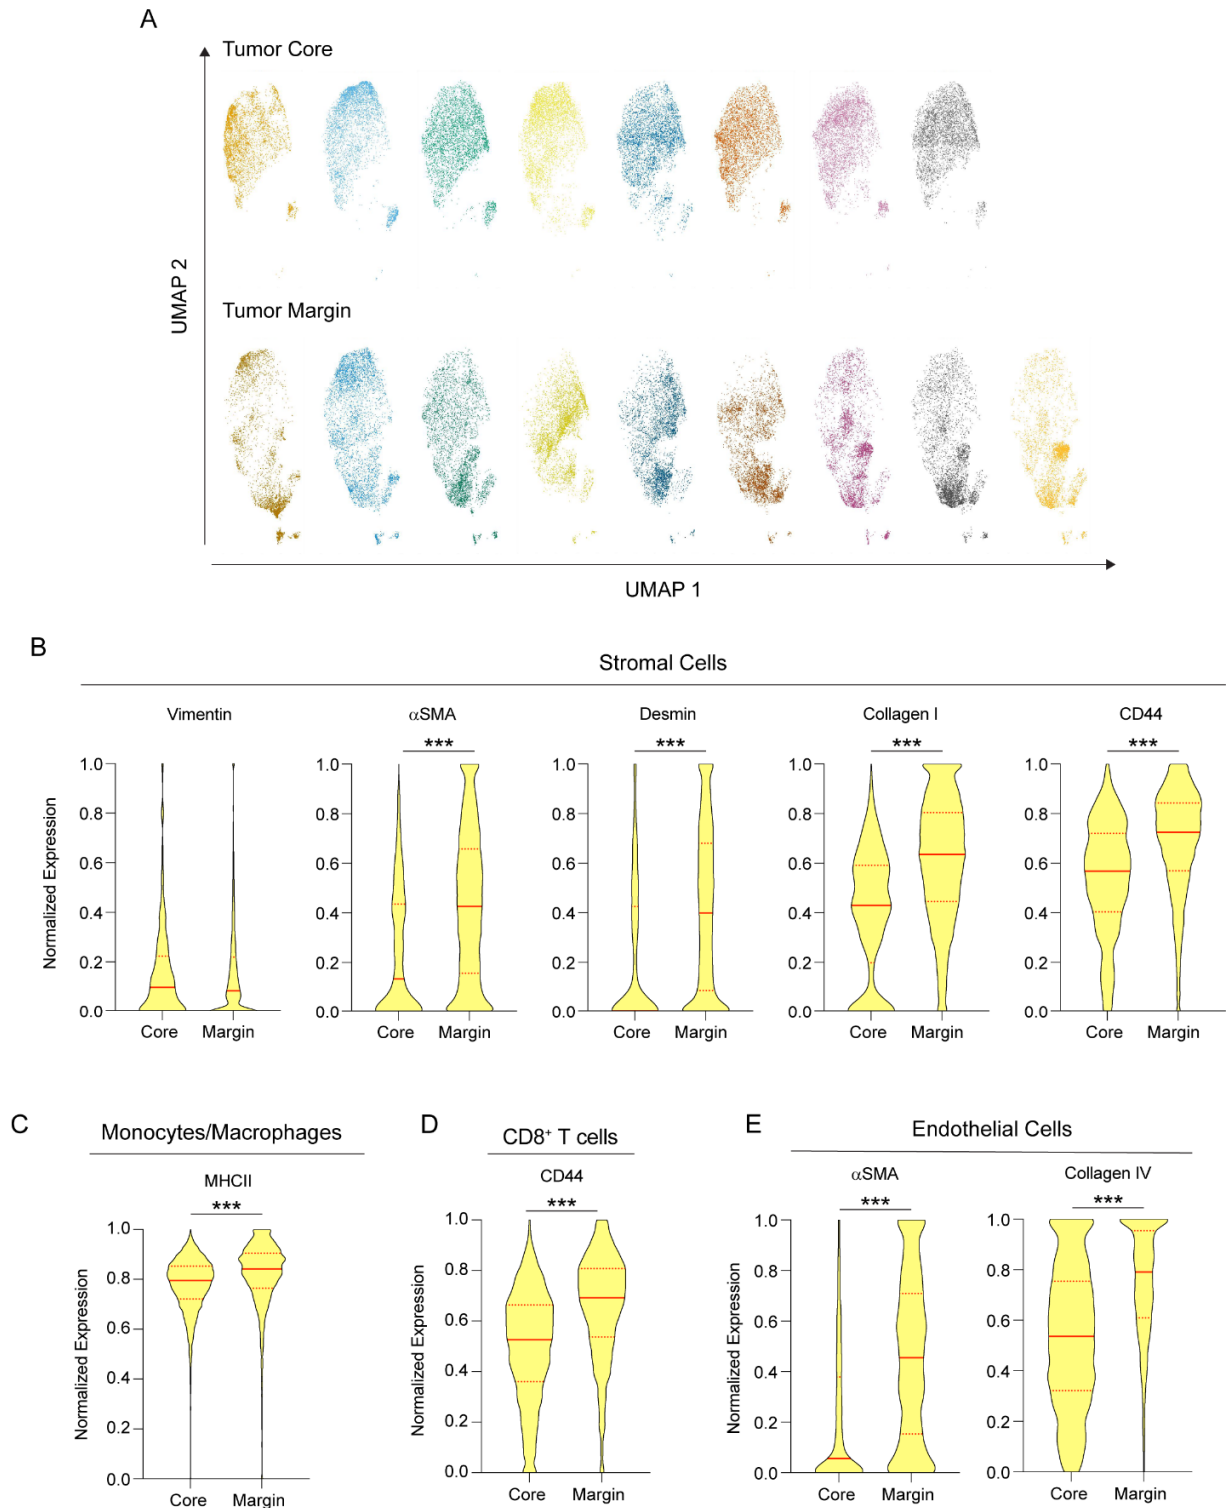

**Supplementary Figure S2: Single-cell distribution in the orthotopic PDAC model.** A) Graphs show the distribution of segmented cells from single acquired ROIs in the UMAP reduced space. UMAP was performed over all the cells from orthotopic model.  $n = 3$  to 6 ROIs for each mouse ( $n=4$ ); Total acquired

ROIs: core:  $n=8$ ; margin:  $n=9$ . **B)** Violin plots showing the difference in the expression of Vimentin,  $\alpha$ SMA, Desmin, Collagen I and CD44 in the stromal cells between tumor core and margin.  $n= 3$  to 6 ROIs for each mouse ( $n=4$ ); Total acquired ROIs: core:  $n=8$ ; margin:  $n=9$ ; Mann–Whitney test: \*\*\*  $p<0.001$  **C)** Violin plots showing the difference in the expression of MHC–II in monocytes/macrophages between tumor core and margin.  $n= 3$  to 6 ROIs for each mouse ( $n=4$ ); Total acquired ROIs: core:  $n=8$ ; margin:  $n=9$ ; Mann–Whitney test: \*\*\*  $p<0.001$  **D)** Violin plots showing the difference in the expression of CD44 in CD8<sup>+</sup> T cells between tumor core and margin.  $n= 3$  to 6 ROIs for each mouse ( $n=4$ ); Total acquired ROIs: core:  $n=8$ ; margin:  $n=9$ ; Mann–Whitney test: \*\*\*  $p<0.001$  **E)** Violin plot showing the difference in the expression of  $\alpha$ SMA and Collagen IV in endothelial cells between tumor core and margin.  $n= 3$  to 6 ROIs for each mouse ( $n=4$ ); Total acquired ROIs: core:  $n=8$ ; margin:  $n=9$ ; Mann–Whitney test: \*\*\*  $p<0.001$

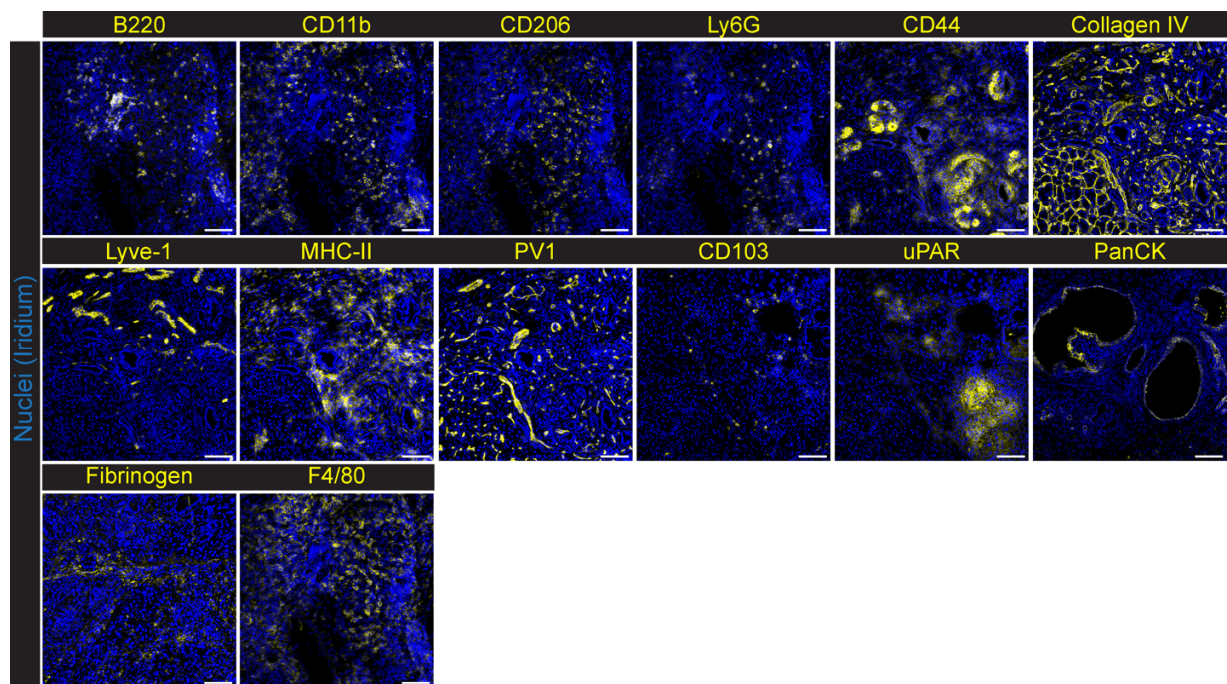

**Supplementary Figure S3: Expression of different markers in the genetic KPC model by IMC.** Nuclei (Ir, blue) and marker expression (yellow) are shown. Bar, 100µm

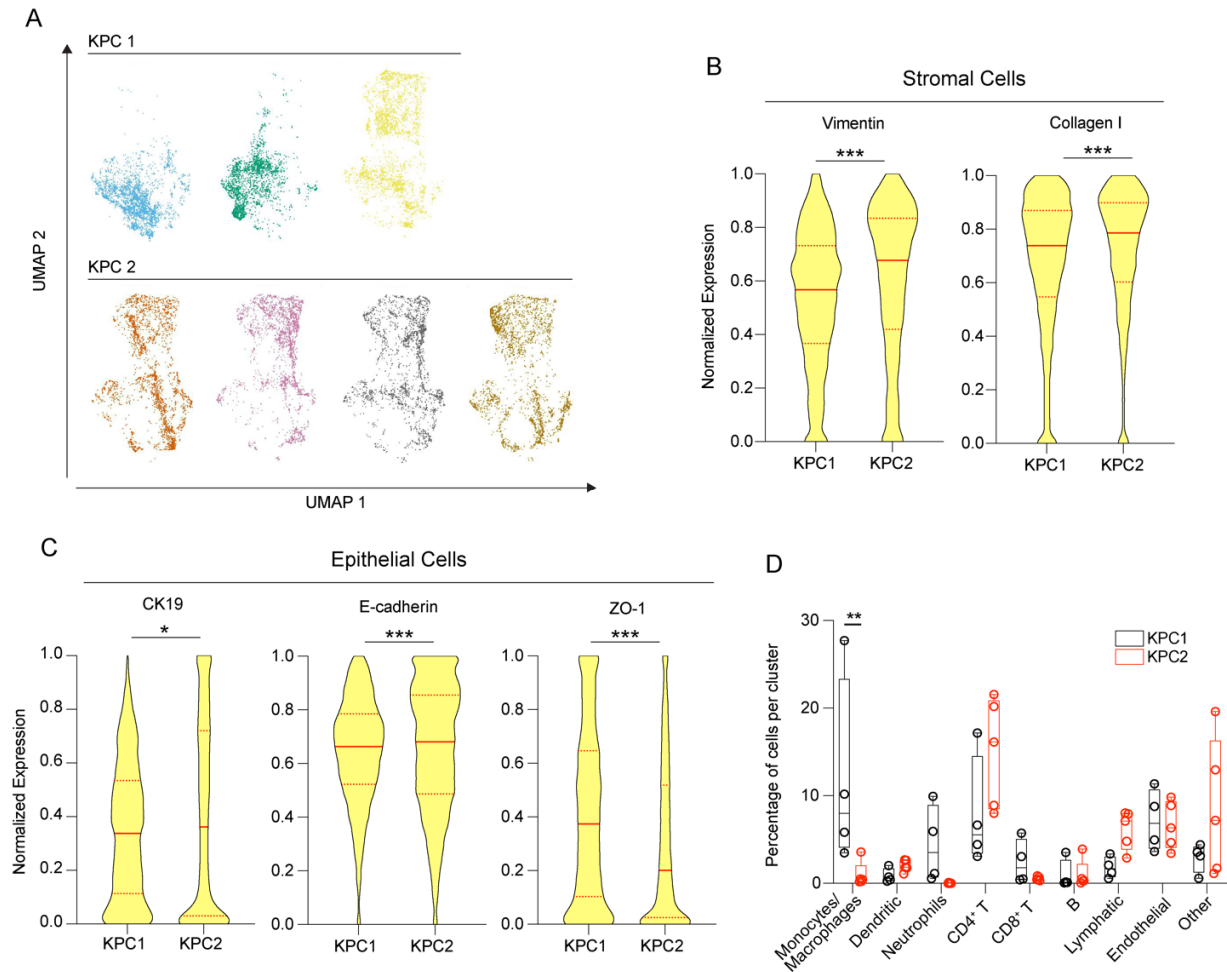

**Supplementary Figure S4: Single cell distribution in the genetic KPC model.** **A)** Cell distribution in the UMAP reduced space for each single ROI in the KPC model. **B)** Violin plot showing the difference in the expression of Vimentin and Collagen I in stromal cells between KPC1 and KPC2 tumor.  $n=4$  to 5 ROIs for each mouse ( $n=2$ ). Total acquired ROIs, KPC1,  $n=4$ ; KPC2,  $n=5$ . Mann–Whitney test: \*\*\*  $p<0.001$ . **C)** Violin plot showing the difference in the expression of CK19, E-cadherin and ZO-1 in epithelial cells between KPC1 and KPC2 tumor.  $n=4$  to 5 ROIs for each mouse ( $n=2$ ). Total acquired ROIs, KPC1,  $n=4$ ; KPC2,  $n=5$ . Mann–Whitney test: \*  $p<0.05$ , \*\*\*  $p<0.001$ . **D)** Box plot shows the difference in the number of cells per cluster between KPC1 and KPC2 mice. Dots represent single ROI abundances.  $n=4$  to 5 ROIs for each mouse ( $n=2$ ). Total acquired ROIs, KPC1,  $n=4$ ; KPC2,  $n=5$ . Two-way ANOVA plus Šídák's multiple comparisons test; \*\*  $p<0.01$ . **C)** Violin plots showing the difference in the expression of CD44 in CD8<sup>+</sup> T cells. Every dot corresponds to a single cell.  $n=4$  to 5 ROIs for each mouse ( $n=2$ ). Total acquired ROIs, KPC1,  $n=4$ ; KPC2,  $n=5$ . Mann–Whitney test: \*\*\*  $p<0.001$
